# Supplementary material for: <strong>The Association Between Presence of Comorbidities and COVID-19 Severity; A Systematic Review and Meta-Analysis </strong>
Source: Preprints.org preprint supplement (doi:10.20944/preprints202008.0475.v1), 2020-08-21
Supplement: Supplementary file 1 [file supplementary]

**Search Strategy:**

**PubMed=395**

“Coronavirus”[Title/Abstract] OR “covid-19”[Title/Abstract] OR “2019-nCoV”[Title/Abstract] OR “nCoV”[Title/Abstract] OR “severe acute respiratory syndrome coronavirus 2”[Title/Abstract] OR “SARS-CoV-2” [Title/Abstract])

AND

“Clinical Feature*”[Title/Abstract] OR “Clinical characteristic*”[Title/Abstract] OR “Cardiovascular disease”[Title/Abstract] OR “CVD”[Title/Abstract] OR “hypertension”[Title/Abstract] OR“Diabet*”[Title/Abstract] OR “Comorbid*”[Title/Abstract] OR “Severity”[Title/Abstract] OR “Laboratory Test*”[Title/Abstract] OR “Biochemical test*”[Title/Abstract] OR “ICU admission”[Title/Abstract] OR “Acute Respiratory Distress Syndrome”[Title/Abstract] OR “ARDS”[Title/Abstract] OR“Paraclinic”[Title/Abstract] OR “CT scan”[Title/Abstract] OR “CT finding”[Title/Abstract] OR “CT image”[Title/Abstract] OR “/Abstract] OR  [“Cerebrovascular disease”[Title/Abstract] OR “Chronic obstructive pulmonary disease”[Title/Abstract] OR “COPD”[Title/Abstract]](https://www.oxfordreference.com/view/10.1093/oi/authority.20110803100230265)

[AND](https://labtestsonline.org/tests/aspartate-aminotransferase-ast)

[("2020/1/1"[Date - Publication] : "2020/4/2"[Date - Publication])](https://labtestsonline.org/tests/aspartate-aminotransferase-ast)
